# Supplementary material
Source: MDPI journal article supplement (https://www.mdpi.com/2073-4441/14/11/1815)
Supplement: s1 [file s1]

## Article

# Using Stable Water Isotopes to Analyze Spatiotemporal Variability and Hydrometeorological Forcing in Mountain Valley Wetlands

Julia M. Hathaway <sup>1</sup>, Richard M. Petrone <sup>1,\*</sup>, Cherie J. Westbrook <sup>2</sup>, Rebecca C. Rooney <sup>3</sup> and Lindsey E. Langs <sup>4,5</sup>

**Table S1.** Summary of samples collected from intensive sites from years 2018–2020 throughout the growing season (May–October). The number and type of sample collected at each site during each month is shown.

|        |         | Groundwater |      |      | Rain |      |      | Snow |      | Stream |      |      | Surface |      |      |
|--------|---------|-------------|------|------|------|------|------|------|------|--------|------|------|---------|------|------|
|        |         | 2018        | 2019 | 2020 | 2018 | 2019 | 2020 | 2018 | 2019 | 2018   | 2019 | 2020 | 2018    | 2019 | 2020 |
| In1419 | May     | -           | 1    | -    | -    | -    | -    | -    | -    | -      | -    | -    | -       | -    | -    |
|        | June    | -           | 1    | -    | -    | 1    | -    | -    | -    | -      | 1    | -    | -       | -    | -    |
|        | July    | 1           | 1    | -    | -    | -    | -    | -    | -    | -      | -    | -    | -       | -    | -    |
|        | August  | 1           | 1    | 1    | 1    | 1    | -    | -    | -    | -      | -    | -    | -       | 1    | -    |
|        | Sept.   | -           | 1    | 1    | -    | 1    | -    | -    | -    | -      | -    | -    | -       | -    | -    |
|        | October | 1           | 1    | -    | 1    | -    | -    | 1    | -    | -      | -    | -    | -       | -    | -    |
| In1490 | May     | -           | 1    | -    | -    | -    | -    | -    | -    | 1      | 1    | -    | -       | -    | -    |
|        | June    | -           | 1    | -    | -    | 1    | -    | -    | -    | -      | 1    | -    | -       | -    | -    |
|        | July    | -           | 1    | -    | -    | 1    | -    | -    | -    | -      | 1    | -    | -       | -    | -    |
|        | August  | -           | 1    | -    | -    | 1    | -    | -    | -    | -      | 1    | -    | -       | -    | -    |
|        | Sept.   | -           | 1    | 1    | -    | 1    | -    | -    | -    | -      | 1    | 1    | -       | -    | 1    |
|        | October | -           | -    | -    | -    | -    | -    | -    | -    | -      | -    | -    | -       | -    | -    |
| In1522 | May     | -           | 1    | -    | -    | -    | -    | -    | -    | -      | 1    | -    | -       | -    | -    |
|        | June    | -           | 1    | -    | -    | -    | -    | -    | -    | 1      | 1    | -    | 1       | -    | -    |
|        | July    | 1           | 1    | -    | -    | -    | -    | -    | -    | 1      | 1    | -    | -       | -    | -    |
|        | August  | 1           | 1    | 1    | 1    | -    | -    | -    | -    | 1      | 1    | 1    | -       | -    | 1    |
|        | Sept.   | -           | 1    | 1    | -    | -    | -    | -    | -    | -      | 1    | 1    | -       | -    | -    |
|        | October | 1           | -    | -    | 1    | -    | -    | 1    | -    | 1      | -    | -    | -       | -    | -    |
| In1692 | May     | -           | -    | -    | -    | -    | -    | -    | -    | 1      | 1    | -    | -       | -    | -    |
|        | June    | -           | -    | -    | -    | -    | -    | -    | -    | -      | 1    | -    | -       | -    | -    |
|        | July    | 1           | -    | -    | -    | -    | -    | -    | -    | 1      | 1    | -    | -       | -    | -    |
|        | August  | 1           | -    | 1    | 1    | -    | -    | -    | -    | 1      | 1    | 1    | -       | -    | -    |
|        | Sept.   | -           | 1    | 1    | -    | 1    | -    | -    | -    | -      | 1    | 1    | -       | 1    | -    |
|        | October | 1           | -    | -    | 1    | -    | -    | 1    | -    | 1      | -    | -    | -       | -    | -    |
| In1745 | May     | -           | 1    | -    | -    | -    | -    | -    | -    | -      | 1    | -    | 1       | -    | -    |
|        | June    | -           | 1    | -    | -    | 1    | -    | -    | -    | -      | 3    | -    | -       | -    | -    |
|        | July    | 1           | 1    | -    | -    | 1    | -    | -    | -    | -      | 1    | -    | -       | -    | -    |
|        | August  | 1           | 1    | 1    | 1    | 1    | -    | -    | -    | 1      | -    | 1    | -       | -    | 1    |
|        | Sept.   | -           | 1    | 1    | -    | 1    | -    | -    | -    | -      | -    | 1    | -       | -    | -    |
|        | October | 1           | -    | -    | 1    | -    | -    | 1    | -    | -      | -    | -    | -       | -    | -    |
| In1822 | May     | -           | 1    | -    | -    | -    | -    | -    | 1    | 1      | 1    | -    | -       | 1    | -    |
|        | June    | -           | 1    | -    | -    | 1    | -    | -    | -    | -      | 1    | -    | -       | -    | -    |
|        | July    | 1           | 1    | -    | -    | 1    | -    | -    | -    | -      | -    | -    | -       | -    | -    |
|        | August  | 1           | 1    | 1    | 1    | 1    | -    | -    | -    | 1      | 2    | 1    | -       | 1    | -    |
|        | Sept.   | -           | 1    | 1    | -    | 1    | -    | -    | -    | -      | -    | 1    | -       | -    | -    |
|        | October | 1           | -    | -    | 1    | -    | -    | 1    | -    | 1      | 1    | -    | -       | -    | -    |
| In1845 | May     | -           | 1    | -    | -    | -    | -    | -    | 1    | -      | -    | -    | -       | -    | -    |
|        | June    | 1           | 1    | -    | -    | 1    | -    | -    | -    | -      | -    | -    | 1       | -    | -    |
|        | July    | 1           | 1    | -    | -    | 1    | -    | -    | -    | -      | -    | -    | 1       | 1    | -    |
|        | August  | -           | 1    | 1    | -    | 1    | -    | -    | -    | -      | 1    | -    | -       | -    | -    |

[illegible]
